# Supplementary material for: How Helpful and What Is the Quality of Digital Sources of Healthy Lifestyle Information Used by Australian Adolescents? A Mixed Methods Study
Source: MDPI journal article supplement (doi:10.3390/ijerph182312844), 2021-12-06
Supplement: s1 [file s1]

**Supplementary Table S3.** Preferences for (i) digital platform and lifestyle behaviour (ii) content interaction or functional features by digital platform

| <b>Preference</b>                                                                     | <b>Digital platform and lifestyle behaviour</b>                                                         | <b>n</b> | <b>%</b> |
|---------------------------------------------------------------------------------------|---------------------------------------------------------------------------------------------------------|----------|----------|
| <i>Preferred platform to see more lifestyle health information (n=297)</i>            | Social media                                                                                            | 149      | 50.2     |
|                                                                                       | Smartphone apps                                                                                         | 40       | 13.5     |
|                                                                                       | Websites                                                                                                | 79       | 26.6     |
|                                                                                       | Streaming services                                                                                      | 29       | 9.8      |
| <i>Preferred lifestyle behaviour to see more lifestyle health information (n=297)</i> | Physical activity                                                                                       | 109      | 36.7     |
|                                                                                       | Nutrition                                                                                               | 91       | 30.6     |
|                                                                                       | Weight management                                                                                       | 53       | 17.8     |
|                                                                                       | Sleep                                                                                                   | 30       | 10.1     |
|                                                                                       | Other                                                                                                   | 14       | 4.7      |
| <b>Digital platform</b>                                                               | <b>Preferred content interaction or functional features</b>                                             | <b>n</b> | <b>%</b> |
| <i>Internet websites (n=232)</i>                                                      | User-friendly                                                                                           | 187      | 80.6     |
|                                                                                       | Credible or reputable content                                                                           | 176      | 75.9     |
|                                                                                       | Regularly updated information                                                                           | 149      | 64.2     |
|                                                                                       | Age-appropriate information                                                                             | 149      | 64.2     |
|                                                                                       | Visually appealing                                                                                      | 120      | 51.7     |
|                                                                                       | Social content or interactivity                                                                         | 56       | 24.1     |
|                                                                                       | Other                                                                                                   | 2        | 0.9      |
| <i>Social media (n=228)</i>                                                           | Browse through content                                                                                  | 187      | 82.0     |
|                                                                                       | Like posts uploaded or shared                                                                           | 136      | 59.6     |
|                                                                                       | Reading through comments                                                                                | 114      | 50.0     |
|                                                                                       | Reading status updates or captions                                                                      | 78       | 34.2     |
|                                                                                       | Share content with other users                                                                          | 33       | 14.5     |
|                                                                                       | Sign up or register for events                                                                          | 18       | 7.9      |
|                                                                                       | Other(s)                                                                                                | 2        | 0.9      |
| <i>Smartphone Apps (n=92)</i>                                                         | Personalised or custom content                                                                          | 77       | 83.7     |
|                                                                                       | Free                                                                                                    | 74       | 80.4     |
|                                                                                       | Efficient or easy to follow                                                                             | 64       | 69.6     |
|                                                                                       | Credible or reputable content                                                                           | 56       | 60.9     |
|                                                                                       | Gamification features                                                                                   | 38       | 41.3     |
|                                                                                       | Social or interactive content                                                                           | 30       | 32.6     |
|                                                                                       | Reminders or notifications                                                                              | 27       | 29.3     |
| <i>Streaming services (functional features) (n=86)</i>                                | Large content library                                                                                   | 58       | 67.4     |
|                                                                                       | Low monthly or membership costs                                                                         | 57       | 66.3     |
|                                                                                       | Enables offline downloads                                                                               | 45       | 52.3     |
|                                                                                       | Higher quality video resolution                                                                         | 43       | 50.0     |
|                                                                                       | Widespread device accessibility                                                                         | 41       | 47.7     |
|                                                                                       | Free trial period                                                                                       | 35       | 40.7     |
|                                                                                       | Diversity of languages or captions                                                                      | 19       | 22.1     |
| <i>Streaming services (content features) (n=86)</i>                                   | Myth busters of 'hot topic' health trends and their impact on exercise performance, diet or weight loss | 53       | 61.6     |
|                                                                                       | Current trends and issues in food, health and pharmaceutical industries                                 | 52       | 60.5     |
|                                                                                       | Impacts of lifestyle factors on environmental sustainability                                            | 50       | 58.1     |
|                                                                                       | Documentaries following real life/personal experiences with a health journey                            | 44       | 51.2     |
|                                                                                       | Educational content on how to make lifestyle changes                                                    | 36       | 41.9     |
|                                                                                       | Food or culinary traditions and cultures                                                                | 28       | 32.6     |
