# Supplementary material for: How Helpful and What Is the Quality of Digital Sources of Healthy Lifestyle Information Used by Australian Adolescents? A Mixed Methods Study
Source: MDPI journal article supplement (doi:10.3390/ijerph182312844), 2021-12-06
Supplement: s1 [file s1]

**Supplementary Table S4.** A) Factors associated with helpfulness for accessing information for each digital platforms B) Factors associated with helpfulness for behaviour change for each digital platforms

| Characteristics, behaviours or health outcomes by helpfulness |                    | Online platforms utilised for health-related purposes |         |                   |         |                    |         |                    |         |
|---------------------------------------------------------------|--------------------|-------------------------------------------------------|---------|-------------------|---------|--------------------|---------|--------------------|---------|
|                                                               |                    | Websites                                              |         | Social media      |         | Smartphone apps    |         | Streaming services |         |
|                                                               |                    | OR (95% CI)                                           | P-value | OR (95% CI)       | P-value | OR (95% CI)        | P-value | OR (95% CI)        | P-value |
| <b>A. Helpfulness for accessing information</b>               |                    |                                                       |         |                   |         |                    |         |                    |         |
| Gender                                                        | Female vs Male     | 1.01 (0.62, 1.67)                                     | 0.9579  | 1.27 (0.76, 2.11) | 0.3619  | 2.03 (0.6, 6.9)    | 0.2524  | 0.85 (0.36, 2.02)  | 0.7192  |
| Age (years)                                                   | 15 – 16 vs 13 – 14 | 0.64 (0.32, 1.3)                                      | 0.4179  | 1.03 (0.53, 2.03) | 0.7545  | 3.08 (0.69, 13.78) | 0.2862  | 1.31 (0.42, 4.16)  | 0.1762  |
|                                                               | 17 – 18 vs 13 – 14 | 0.67 (0.34, 1.3)                                      |         | 1.23 (0.64, 2.36) |         | 1.49 (0.31, 7.09)  |         | 0.57 (0.18, 1.78)  |         |
| Fruit (serves/day) <sup>1</sup>                               | < 2 vs ≥ 2         | -                                                     | -       | -                 | -       | 9.86 (2.86, 33.93) | <.0001  | -                  | -       |
| <b>B. Helpfulness for behaviour change</b>                    |                    |                                                       |         |                   |         |                    |         |                    |         |
| Gender                                                        | Female vs Male     | 0.84 (0.5, 1.41)                                      | 0.5106  | 0.88 (0.52, 1.49) | 0.6231  | 2.29 (0.92, 5.71)  | 0.0749  | 0.86 (0.37, 2.02)  | 0.7311  |
| Age                                                           | 15 – 16 vs 13 – 14 | 1.06 (0.53, 2.11)                                     | 0.6968  | 0.83 (0.41, 1.66) | 0.3961  | 1.74 (0.57, 5.34)  | 0.0976  | 0.75 (0.25, 2.28)  | 0.5558  |
|                                                               | 17 – 18 vs 13 – 14 | 1.28 (0.66, 2.51)                                     |         | 1.24 (0.63, 2.44) |         | 3.67 (1.08, 12.46) |         | 0.55 (0.18, 1.67)  |         |
| Chronic medical condition                                     | Yes vs No          | -                                                     | -       | -                 | -       | 0.7 (0.27, 1.85)   | 0.4719  | -                  | -       |

<sup>1</sup> Australian national dietary guideline recommends two serves of fruit per day for adolescents, 13-18 years
