# Supplementary material for: How Helpful and What Is the Quality of Digital Sources of Healthy Lifestyle Information Used by Australian Adolescents? A Mixed Methods Study
Source: MDPI journal article supplement (doi:10.3390/ijerph182312844), 2021-12-06
Supplement: s1 [file s1]

**Supplementary Table S5.** Content analysis on the quality of most popular content from each digital platform

| Category                                                                                       | Digital platforms                                                                                                           |                                                                                                 |                                                                                                   |                                                                                                                              |
|------------------------------------------------------------------------------------------------|-----------------------------------------------------------------------------------------------------------------------------|-------------------------------------------------------------------------------------------------|---------------------------------------------------------------------------------------------------|------------------------------------------------------------------------------------------------------------------------------|
|                                                                                                | Social media                                                                                                                | Smartphone apps                                                                                 | Websites                                                                                          | Streaming services                                                                                                           |
| <b>Name</b>                                                                                    | Chloe Ting                                                                                                                  | Fitbit                                                                                          | Healthline                                                                                        | What the Health                                                                                                              |
| <b>Frequency</b>                                                                               |                                                                                                                             |                                                                                                 |                                                                                                   |                                                                                                                              |
| N, % of mentions by participants                                                               | 30/568, 5.3%                                                                                                                | 16/156, 8.8%                                                                                    | 30/314, 9.6%                                                                                      | 16/64, 25.0%                                                                                                                 |
| <b>Expertise</b>                                                                               |                                                                                                                             |                                                                                                 |                                                                                                   |                                                                                                                              |
| Individual health professional                                                                 | Individual health professional                                                                                              | Commercial company                                                                              | Commercial Company                                                                                | Company                                                                                                                      |
| Individual non-health professional                                                             | • Personal trainer                                                                                                          | • Sell sensors and wireless technology                                                          | • Health news website                                                                             | • Sensational documentary                                                                                                    |
| Health organisation                                                                            | • Other non-health qualifications listed                                                                                    |                                                                                                 |                                                                                                   |                                                                                                                              |
| Non-health organisation                                                                        |                                                                                                                             |                                                                                                 |                                                                                                   |                                                                                                                              |
| Commercial company                                                                             |                                                                                                                             |                                                                                                 |                                                                                                   |                                                                                                                              |
| Other                                                                                          |                                                                                                                             |                                                                                                 |                                                                                                   |                                                                                                                              |
| <b>Objectivity</b>                                                                             |                                                                                                                             |                                                                                                 |                                                                                                   |                                                                                                                              |
| Are there any commercial interests like products or programs or personal feelings?             | Yes <ul style="list-style-type: none"> <li>• Advertising present within posts e.g. Victoria's Secret advertising</li> </ul> | Yes <ul style="list-style-type: none"> <li>• Sell sensors and wireless technology</li> </ul>    | Yes <ul style="list-style-type: none"> <li>• Advertise products and services e.g. Noom</li> </ul> | Yes <ul style="list-style-type: none"> <li>• Selective interviewing by production team based on personal feelings</li> </ul> |
| <b>Transparency</b>                                                                            |                                                                                                                             |                                                                                                 |                                                                                                   |                                                                                                                              |
| Are important information that influences a user's ability to make informed choices disclosed? | No <ul style="list-style-type: none"> <li>• Individual influencer</li> <li>• No list of disclosures</li> </ul>              | Yes <ul style="list-style-type: none"> <li>• Terms of service listed on website</li> </ul>      | Yes <ul style="list-style-type: none"> <li>• Ads and sponsorship policy available</li> </ul>      | No <ul style="list-style-type: none"> <li>• Selective interviewing not disclosed by production team</li> </ul>               |
| <b>Popularity</b>                                                                              |                                                                                                                             |                                                                                                 |                                                                                                   |                                                                                                                              |
| Number of active platforms (Instagram, Facebook, YouTube, TikTok)                              | 4                                                                                                                           | -                                                                                               | -                                                                                                 | -                                                                                                                            |
| Number followers on Instagram, Facebook, YouTube, TikTok                                       | 24,018,234                                                                                                                  | -                                                                                               | -                                                                                                 | -                                                                                                                            |
| <b>Relevance</b>                                                                               |                                                                                                                             |                                                                                                 |                                                                                                   |                                                                                                                              |
| Is there content relevant to physical activity?                                                | Yes <ul style="list-style-type: none"> <li>• Workout programs</li> </ul>                                                    | Yes <ul style="list-style-type: none"> <li>• App features to track physical activity</li> </ul> | Yes <ul style="list-style-type: none"> <li>• Health topics include physical activity</li> </ul>   | No                                                                                                                           |

| Category                                        | Digital platforms                                                                                                      |                                                                                                    |                                                                                       |                                                                                                |
|-------------------------------------------------|------------------------------------------------------------------------------------------------------------------------|----------------------------------------------------------------------------------------------------|---------------------------------------------------------------------------------------|------------------------------------------------------------------------------------------------|
|                                                 | Social media                                                                                                           | Smartphone apps                                                                                    | Websites                                                                              | Streaming services                                                                             |
| Is there content relevant to weight management? | Yes <ul style="list-style-type: none"> <li>Promoting a ‘summer shred’ challenge</li> <li>Body focused poses</li> </ul> | Yes <ul style="list-style-type: none"> <li>App features to track weight and weight loss</li> </ul> | Yes <ul style="list-style-type: none"> <li>Health topics weight management</li> </ul> | Yes <ul style="list-style-type: none"> <li>Content is relevant to weight management</li> </ul> |
| Is there content relevant to nutrition?         | Yes <ul style="list-style-type: none"> <li>Recipe and meal ideas provided</li> </ul>                                   | Yes <ul style="list-style-type: none"> <li>App features to track dietary intake</li> </ul>         | Yes <ul style="list-style-type: none"> <li>Health topics include nutrition</li> </ul> | Yes <ul style="list-style-type: none"> <li>Content is relevant to nutrition</li> </ul>         |
| Is there content relevant to sleep?             | No                                                                                                                     | Yes <ul style="list-style-type: none"> <li>App features to track sleep</li> </ul>                  | Yes <ul style="list-style-type: none"> <li>Health topics include sleep</li> </ul>     | No                                                                                             |
