# Supplementary material for: How Helpful and What Is the Quality of Digital Sources of Healthy Lifestyle Information Used by Australian Adolescents? A Mixed Methods Study
Source: Int J Environ Res Public Health. 2021 Dec 6;18(23):12844. doi: 10.3390/ijerph182312844 (PMC8657837; doi:10.3390/ijerph182312844)
Supplement: Supplementary file 1 [file ijerph-18-12844-s001.zip]

Archive with 6 entries (6 files):
- Digitalize Supplementary Figure S1.png
- Digitalize Supplementary Table S1.pdf
- Digitalize Supplementary Table S2.pdf
- Digitalize Supplementary Table S3.pdf
- Digitalize Supplementary Table S4.pdf
- Digitalize Supplementary Table S5.pdf
